# Supplementary material
Source: PubMed Central journal article supplement (PMC4229045)
Supplement: NIHMS638969-supplement-Supplementary_Information.pdf [file NIHMS638969-supplement-Supplementary_Information.pdf]

## The Penetrance of Copy Number Variations for Schizophrenia and Developmental Delay

### Supplemental Information

**Table S1.** Summary of the new samples of cases and controls analyzed for the current study. For analysis of CNVs in this study we only used SNPs that were overlapping on all these arrays:

| <b>Dataset</b>                                                                             | <b>Source (accession ID)</b> | <b>Array (<i>n</i> probes)</b>                 | <b><i>n</i> Samples Before QC</b> | <b><i>n</i> Samples After QC</b> |
|--------------------------------------------------------------------------------------------|------------------------------|------------------------------------------------|-----------------------------------|----------------------------------|
| Schizophrenia Batch 1                                                                      | Broad Institute              | HumanOmniExpress-12v1<br>(730,525)             | 2,469                             | 2,393                            |
| Schizophrenia Batch 2                                                                      | Broad Institute              | HumanOmniExpressExome-8v1<br>(951,117)         | 3,621                             | 3,490                            |
| Schizophrenia Batch 3                                                                      | Broad Institute              | HumanOmniExpressExome-8v1<br>(951,117)         | 1,039                             | 999                              |
| The Genetic Architecture of Smoking and Smoking Cessation                                  | dbGaP (phs000404.v1.p1)      | Illumina HumanOmni2.5 (2,443,179)              | 1,491                             | 1,488                            |
| High Density SNP Association Analysis of Melanoma: Case-Control and Outcomes Investigation | dbGaP (phs000187.v1.p1)      | Illumina HumanOmni1_Quad_v1-0-B<br>(1,051,295) | 3,102                             | 2,971                            |
| Genetic Epidemiology of Refractive Error in the KORA Study                                 | dbGaP (phs000303.v1.p1)      | Illumina HumanOmni2.5 (2,443,179)              | 1,869                             | 1,857                            |
| WTCCC2 samples from National Blood Donors (NBS) Cohort                                     | EGA (EGAD00000000024)        | Illumina 1.2M (1,238,733)                      | 2,697                             | 2,375                            |
| WTCCC2 samples from 1958 British Birth Cohort                                              | EGA (EGAD00000000022)        | Illumina 1.2M (1,238,733)                      | 2,921                             | 2,564                            |

CNV, copy number variation; NBS, National Blood Service; QC, quality control; SNP, single nucleotide polymorphism; WTCCC, Wellcome Trust Case Control Consortium.

### **Copy Number Variation (CNV) Calling and Quality Control (QC)**

Genotyping of the schizophrenia (SCZ) patients from the CLOZUK and CardiffCOGS samples was performed at the Stanley Center for Psychiatric Research at the Broad Institute, Cambridge, Massachusetts on two different arrays: HumanOmniExpress-12v1 (Omni Express array), and HumanOmniExpressExome-8v1 (Combo array) (Table S1). The Combo array contains, in addition to the single nucleotide polymorphisms (SNPs) from the Omni Express, those from the Illumina HumanExome-12v1\_A (Exome array). Different Illumina array platforms were used for genotyping the case and control datasets, each with different SNP probe sets (Table S1). To make the CNV calling comparable across the different arrays used, we only analyzed the 520,766 probes present on all arrays on Table S1. A CNV was called as covering a CNV locus if it spanned >50% of the region commonly accepted for that CNV (Table S2). In the case of loci that include only single genes (*NRXN1*, *SIMI*, *YWHAE*, *PAFAH1B1* and *NF1*), we accepted CNVs that intersected at least one exon of the gene in question.

Each case and control dataset was analyzed independently to avoid batch effects. The raw intensity data was processed using the Illumina Genome Studio software (v2011.1). PennCNV (<http://www.openbioinformatics.org/penncnv/>) was used to call CNVs from the data following the standard protocol and adjusting for GC content. Samples were excluded if for any one of the following QC metrics they represented an outlier in their source dataset: Log2 ratio standard deviation, B-allele frequency drift, wave factor and total number of CNVs called per person. The proportion of excluded samples in the control datasets should not be taken as evidence about different quality of the datasets, as some of these had already been filtered for quality before being downloaded from dbGaP. Samples were checked for duplicates with an identity by descent analysis using PLINK (<http://pngu.mgh.harvard.edu/~purcell/plink/>) and the duplicate with the better QC was retained. After the poorly performing and duplicated samples had been identified and excluded, all CNVs went through further QC filtering. Firstly, raw CNVs in the same sample were joined together if the distance separating them was less than 50% of their combined length, using an in-house developed program freely available from <http://x004.psychm.uwcm.ac.uk/~dobril/>. CNVs were then excluded if they were covered by less than 10 probes, were less than 10 kb in length, overlapped with low copy repeats by more than 50% of their length, or had a probe density (calculated by dividing the size

of the CNV by the number of probes covering it) greater than 20 k. The remaining high quality CNVs from each dataset were then merged together and CNV loci with a frequency greater than 1% were filtered out using PLINK.

The remaining rare CNVs were required to pass a median Z-score outlier method of validation freely available from <http://x004.psych.uwcm.ac.uk/~dobril/>. This method is detailed in Kirov *et al.*, 2012 (15). Briefly, the Z-score method standardizes SNP probe intensities for each individual across all SNP probes and then standardizes the intensity of each SNP probe across all individuals. These rounds of standardization help reduce noise created by natural fluctuations in probe intensity. A median Z-score value for all standardized probe intensities within a putative CNV region is used to assess copy number, with true deletions and duplications represented as outliers in the samples median Z-score distribution. Z-score histograms of CNVs with marginal Z-Scores (between -6 to -4 and +2 to +4) were visually inspected using the Illumina GenomeStudio v2011.1 software.

The MGS and ISC samples were genotyped at the Broad Institute, Cambridge, Massachusetts, using Affymetrix 6.0 genotyping arrays (for MGS) and Affymetrix 6.0 or 5.0 (for ISC). CNVs were called using the Birdsuite algorithm, and filtered for size (<15 kb) and probe cover (<15 probes). Similar criteria as above were used for joining CNVs, filtering for low copy repeats (LCRs), 50% cover of CNV loci, 1% frequency criterion, Log2 ratio standard deviation, and total number of CNVs called per person (as an outlier of the distribution in the dataset). For the purpose of this analysis we retained all ethnicities from all datasets. Restricting the data to only white European subjects makes practically no difference to the conclusions (data not shown), as the frequencies of most of these CNVs are under strong selection pressure and are not governed by the laws of genetic drift, in the way common variants are, and because the subjects with an European origin make up the vast majority of the samples: >91% of the “Current study” samples listed in Table S1, all of the ISC and a substantial proportion of the MGS sample (2,671 cases and 2,648 controls), while the remaining samples in that dataset are of African American ancestry.

**Table S2.** Rate of CNVs in different phenotypes.

| Locus                     | Position           | <i>n</i> probes on Illumina Arrays | MR/DD/CM/ASD         | SCZ                  | Controls             |
|---------------------------|--------------------|------------------------------------|----------------------|----------------------|----------------------|
| 1p36 del                  | chr1:0,00-10,07    | 1954                               | 0.24% (78/32,587) A  | 0% (0/13,465) D      | 0% (0/17,873) D      |
| 1q21.1 del                | chr1:146,57-147,39 | 223                                | 0.29% (97/33,226) B  | 0.17% (33/19,056) E  | 0.021% (17/81,821) E |
| 1q21.1 dup                | chr1:146,57-147,39 | 223                                | 0.2% (68/33,226) B   | 0.13% (21/16,244) E  | 0.037 (24/64,046) E  |
| <i>NRXN1</i> del          | chr2:50,14-51,26   | 236                                | 0.18% (12/6,623) C   | 0.18% (33/18,759) F  | 0.02% (10/51,161) F  |
| 2q23.1 del                | chr2:148,72-149,29 | 47                                 | 0.06% (20/32,587) A  | 0.0074% (1/13,465) D | 0% (0/17,873) D      |
| 2q37 del                  | chr2:239,71-242,47 | 622                                | 0.052% (17/32,587) A | 0% (0/13,465) D      | 0% (0/17,873) D      |
| 2q37 dup                  | chr2:239,71-242,47 | 622                                | 0.006% (2/32,587) A  | 0% (0/13,465) D      | 0% (0/17,873) D      |
| 3q29 del                  | chr3:195,73-197,34 | 294                                | 0.06% (20/32,587) A  | 0.082% (14/17,005) E | 0.0014% (1/69,965) E |
| 3q29 dup                  | chr3:195,73-197,34 | 294                                | 0.055% (18/32,587) A | 0% (0/13,465) D      | 0% (0/17,873) D      |
| Wolf-Hirschhorn del       | chr4:1,53-2,03     | 50                                 | 0.052% (17/32,587) A | 0% (0/13,465) D      | 0% (0/17,873) D      |
| Wolf-Hirschhorn dup       | chr4:1,53-2,03     | 50                                 | 0.012% (4/32,587) A  | 0% (0/13,465) D      | 0% (0/17,873) D      |
| Sotos syndrome del        | chr5:175,72-177,06 | 256                                | 0.043% (14/32,587) A | 0% (0/13,465) D      | 0% (0/17,873) D      |
| Sotos syndrome dup        | chr5:175,72-177,06 | 256                                | 0.012% (4/32,587) A  | 0.0074% (1/13,465) D | 0% (0/17,873) D      |
| 6p25 del                  | chr6:0,16-6,06     | 1597                               | 0.071% (23/32,587) A | 0% (0/13,465) D      | 0% (0/17,873) D      |
| 6p25 dup                  | chr6:0,16-6,06     | 1597                               | 0.037% (12/32,587) A | 0% (0/13,465) D      | 0% (0/17,873) D      |
| 6q16 (SIM1) del           | chr6:100,84-100,91 | 15                                 | 0.0042% (1/23,380) A | 0% (0/13,465) D      | 0% (0/17,873) D      |
| 6q16 (SIM1) dup           | chr6:100,84-100,91 | 15                                 | 0.0042% (1/23,380) A | 0% (0/13,465) D      | 0.0056% (1/17,873) D |
| WBS del                   | chr7:72,74-74,14   | 207                                | 0.25% (83/32,587) A  | 0% (0/13,465) D      | 0% (0/17,873) D      |
| WBS dup                   | chr7:72,74-74,14   | 207                                | 0.12% (39/32,587) A  | 0.066% (14/21,269) G | 0.0058% (2/34,455) G |
| 8p23.1 del                | chr8:8,09-11,89    | 1056                               | 0.055% (18/32,587) A | 0.0074% (1/13,465) D | 0% (0/17,873) D      |
| 8p23.1 dup                | chr8:8,09-11,89    | 1056                               | 0.074% (24/32,587) A | 0% (0/13,465) D      | 0% (0/17,873) D      |
| 9q34 del                  | chr9:137,81-141,08 | 657                                | 0.055% (18/32,587) A | 0% (0/13,465) D      | 0% (0/17,873) D      |
| 9q34 dup                  | chr9:137,81-141,08 | 657                                | 0.025% (8/32,587) A  | 0% (0/13,465) D      | 0% (0/17,873) D      |
| 10q23 del                 | chr10:81,96-88,80  | 1344                               | 0.086% (28/32,587) A | 0% (0/13,465) D      | 0% (0/17,873) D      |
| 10q23 dup                 | chr10:81,96-88,80  | 1344                               | 0.015% (5/32,587) A  | 0.015% (2/13,465) D  | 0% (0/17,873) D      |
| 15q11.2 del               | chr15:22,80-23,09  | 76                                 | 0.80% (203/25113) B  | 0.59% (116/19,547) E | 0.28% (227/81,802) E |
| 15q11-13 (PWS/AS) any del | chr15:24,82-28,43  | 886                                | 0.18% (60/32,587) A  | 0% (0/13,465) D      | 0% (0/17,873) D      |
| 15q11-13 (PWS/AS) any dup | chr15:24,82-28,43  | 886                                | 0.25% (82/32,587) A  | 0.079 (12/15,266) E  | 0.0083 (5/60,148) E  |
| 15q13.3 del               | chr15:31,13-32,48  | 235                                | 0.26% (85/32,587) A  | 0.14% (26/18,571) E  | 0.019% (15/80,422) E |

| Locus                        | Position          | <i>n</i> probes on Illumina Arrays | MR/DD/CM/ASD         | SCZ                  | Controls             |
|------------------------------|-------------------|------------------------------------|----------------------|----------------------|----------------------|
| 15q13.3 dup                  | chr15:31,13-32,48 | 235                                | 0.083% (27/32,587) A | 0.074% (10/13,465) D | 0.039% (7/17,873) D  |
| 15q13.3 smaller (CHRNA7) del | chr15:32,01-32,45 | 64                                 | 0.03% (7/23,380) A   | 0.015% (2/13,465) D  | 0% (0/17,873) D      |
| 15q13.3 smaller (CHRNA7) dup | chr15:32,01-32,45 | 64                                 | 0.56% (130/23,380) A | 0.62% (83/13,465) D  | 0.73% (131/17,873) D |
| 15q24 del                    | chr15:72,91-74,41 | 196                                | 0.025% (8/32,587) A  | 0% (0/13,465) D      | 0% (0/17,873) D      |
| 15q24 dup                    | chr15:72,91-74,41 | 196                                | 0.012% (4/32,587) A  | 0% (0/13,465) D      | 0% (0/17,873) D      |
| 15q24.2q24.5 del             | chr15:75,97-78,20 | 218                                | 0.015% (5/32,587) A  | 0% (0/13,465) D      | 0% (0/17,873) D      |
| 15q24.2q24.5 dup             | chr15:75,97-78,20 | 218                                | 0.018% (6/32,587) A  | 0% (0/13,465) D      | 0% (0/17,873) D      |
| 15q25 del                    | chr15:83,18-84,74 | 227                                | 0.0086% (2/23,380) A | 0% (0/13,465) D      | 0% (0/17,873) D      |
| 15q25 dup                    | chr15:83,18-84,74 | 227                                | 0.017% (4/23,380) A  | 0% (0/13,465) D      | 0% (0/17,873) D      |
| 16p13.11 del                 | chr16:15,51-16,30 | 358                                | 0.15% 50/33,226 B    | 0.074% (10/13,465) D | 0.039% (7/17,873) D  |
| 16p13.11 dup                 | chr16:15,51-16,30 | 358                                | 0.3% (98/32,587) A   | 0.31% (37/12,029) E  | 0.13% (93/69,289) E  |
| 16p11.2p12.1 del             | chr16:21,53-29,10 | 1462                               | 0.061% (20/32,587) A | 0% (0/13,465) D      | 0% (0/17,873) D      |
| 16p11.2p12.1 dup             | chr16:21,53-29,10 | 1462                               | 0.043% (14/32,587) A | 0% (0/13,465) D      | 0% (0/17,873) D      |
| 16p12.1 del                  | chr16:21,94-22,46 | 67                                 | 0.19% (62/33,226) B  | 0.18% (24/13,465) D  | 0.05% (9/17,873) D   |
| 16p12.1 dup                  | chr16:21,94-22,46 | 67                                 | 0.049% (16/32,587) A | 0.037% (5/13,465) D  | 0.05% (9/17,873) D   |
| 16p11.2 distal del           | chr16:28,82-29,05 | 39                                 | 0.14% (46/33,226) B  | 0.063% (13/20,732) H | 0.018% (5/27,045) H  |
| 16p11.2 distal dup           | chr16:28,82-29,05 | 39                                 | 0.075% (25/33,226) B | 0.037% (5/13,465) D  | 0.056% (10/17,873) D |
| 16p11.2 del                  | chr16:29,64-30,20 | 99                                 | 0.19% (62/33,226) B  | 0.03% (5/16,772) E   | 0.041% (26/63,068) E |
| 16p11.2 dup                  | chr16:29,64-30,20 | 99                                 | 0.28% (93/33,226) B  | 0.35% (58/16,772) E  | 0.03% (19/63,068) E  |
| Rubinstein-Taybi del         | chr16:3,78-3,93   | 21                                 | 0.031% (10/32,587) A | 0% (0/13,465) D      | 0.0056% (1/17,873) D |
| 17p13.3 (YWHAE) del          | chr17:1,25-1,30   | 11                                 | 0.021% (7/32,587) A  | 0% (0/13,465) D      | 0.0056% (1/17,873) D |
| 17p13.3 (YWHAE) dup          | chr17:1,25-1,30   | 11                                 | 0.04% (13/32,587) A  | 0.022% (3/13,465) D  | 0.017% (3/17,873) D  |
| 17p13.3 (PAFAH1B1) del       | chr17:2,49-2,59   | 14                                 | 0.025% (8/32,587) A  | 0% (0/13,465) D      | 0% (0/17,873) D      |
| 17p13.3 (PAFAH1B1) dup       | chr17:2,49-2,59   | 14                                 | 0.028% (9/32,587) A  | 0% (0/13,465) D      | 0.0056% (1/17,873) D |
| Smith-Magenis (del)          | chr17:16,82-18,28 | 284                                | 0.095% (31/32,587) A | 0% (0/13,465) D      | 0% (0/17,873) D      |
| Potocki-Lupski (dup)         | chr17:16,82-18,28 | 284                                | 0.077% (25/32,587) A | 0.0074% (1/13,465) D | 0% (0/17,873) D      |
| NF1 del                      | chr17:29,10-30,28 | 188                                | 0.08% (26/32,587) A  | 0% (0/13,465) D      | 0.0056% (1/17,873) D |
| NF1 dup                      | chr17:29,10-30,28 | 188                                | 0.11% (35/32,587) A  | 0.0074% (1/13,465) D | 0% (0/17,873) D      |
| 17q12 del                    | chr17:34,81-36,20 | 304                                | 0.087% (29/33,226) B | 0.036% (5/14,024) E  | 0.0054% (4/74,447) E |
| 17q12 dup                    | chr17:34,81-36,20 | 304                                | 0.11% (37/33,226) B  | 0.045% (6/13,465) D  | 0.022% (4/17,873) D  |
| 17q21.31 del                 | chr17:43,70-44,18 | 78                                 | 0.13% (42/32,587) A  | 0% (0/13,465) D      | 0% (0/17,873) D      |

| Locus               | Position          | <i>n</i> probes on Illumina Arrays | MR/DD/CM/ASD         | SCZ                  | Controls             |
|---------------------|-------------------|------------------------------------|----------------------|----------------------|----------------------|
| 17q21.31 dup        | chr17:43,70-44,18 | 78                                 | 0.015% (5/32,587) A  | 0.0074% (1/13,465) D | 0% (0/17,873) D      |
| 17q23 del           | chr17:58,25-60,29 | 256                                | 0.018% (6/32,587) A  | 0% (0/13,465) D      | 0% (0/17,873) D      |
| 17q23 dup           | chr17:58,25-60,29 | 256                                | 0.0031% (1/32,587) A | 0% (0/13,465) D      | 0% (0/17,873) D      |
| 19p13.12 del        | chr19:13,08-16,70 | 939                                | 0.04% (13/32,587) A  | 0% (0/13,465) D      | 0% (0/17,873) D      |
| 22q11.21 del (VCFS) | chr22:19,02-20,26 | 351                                | 0.54% (175/32,587) A | 0.29% (56/19,084) E  | 0% (0/77,055) E      |
| 22q11.21 dup        | chr22:19,02-20,26 | 351                                | 0.3% (136/48,637) B  | 0.019% (3/15,583) E  | 0.075% (25/33,449) E |
| 22q11.2 distal del  | chr22:21,91-23,65 | 283                                | 0.11% (26/23,380) A  | 0% (0/13,465) D      | 0% (0/17,873) D      |
| 22q11.2 distal dup  | chr22:21,91-23,65 | 283                                | 0.077% (18/23,380) A | 0.0074% (1/13,465) D | 0.017% (3/17,873) D  |
| Phelan-McDermid del | chr22:43,00-51,16 | 2368                               | 0.25% (59/32,587) A  | 0% (0/13,465) D      | 0% (0/17,873) D      |
| 22q13 dup           | chr22:43,00-51,16 | 2368                               | 0.0092% (3/32,587) A | 0% (0/13,465) D      | 0% (0/17,873) D      |

ASD, autism spectrum disorders; CM, congenital malformations; CNV, copy number variations; DD, developmental delay; del, deletion; dup, duplication; MR, mental retardation; SCZ, schizophrenia.

The numbers of CNVs and the size of the samples are given in the following format: (number of carriers/total number of tested individuals). They are taken from the following sources:

A) Girirajan *et al.*, 2012 (1): 32,587 or 23,380 cases affected with DD/ASD/CM.

B) Rosenfeld *et al.*, 2012 (2): 25,113, 33,226 or 48,637 cases affected with DD/ASD/CM.

C) Chen *et al.*, 2013 (3): 6,623 cases affected with neurodevelopmental disorders.

D) Current sample (6882 cases / 11,255 controls, as presented in Table S1) + ISC study (3391 cases / 3181 controls) + MGS study (3192 cases / 3437 controls) = 13,465 cases and 17,873 controls.

E) Current sample as in D but without WTCCC controls (6882 cases / 6316 controls) + results from the review by Malhotra & Sebat (4) (various numbers). The WTCCC controls were included in most of the estimates in the other reviews, including that of Malhotra & Sebat (4), therefore they are not included in the “current sample” numbers in these and in the remaining loci listed below.

F) For *NRXN1*: Current sample as in D), but without WTCCC controls (6882 cases / 6316 controls) + review by Kirov *et al.*, 2009 (ref 13 from the main text) + MGS study as reported by Levinson *et al.* (68).

G) For WBS: Current sample as in D) but without WTCCC controls (6882 cases / 6316 controls) + results by Mulle *et al.* (69).

H) For 16p11.2 distal deletion: Current sample as in D) but without WTCCC controls (6882 cases / 6316 controls) + results by Guha *et al.* (50).

“*n* probes on Illumina arrays” refers to the number of probes common on all Illumina arrays used in the “Current sample” that cover the CNV regions presented in this table, column 2.

**Table S3.** Publications used to derive the *de novo* rate and selection coefficients of CNVs. The table lists the disorders on which the observations were made. The numbers are presented as *de novo*/(*de novo*+inherited). The selection coefficients (*s*) are presented in the last two columns, as the ratio of *de novo*/(*de novo*+inherited) numbers. No selection coefficients are presented for cases with <5 observations, as they would be very unreliable. The list of CNVs is based on Girirajan *et al.* (1) and for most loci that are not associated with SCZ, the numbers are based on that paper alone. In bold are results for loci associated with SCZ.

| Locus                                 | Reference                                                                                                                                                                                                                                                                                                                                                                                                                                                                                              | Deletions                                                                                 | Duplications                                                                   |
|---------------------------------------|--------------------------------------------------------------------------------------------------------------------------------------------------------------------------------------------------------------------------------------------------------------------------------------------------------------------------------------------------------------------------------------------------------------------------------------------------------------------------------------------------------|-------------------------------------------------------------------------------------------|--------------------------------------------------------------------------------|
| 1p36                                  | Girirajan <i>et al.</i> (2012) (1)                                                                                                                                                                                                                                                                                                                                                                                                                                                                     | <b>9/11=0.82</b>                                                                          | NA                                                                             |
| 1q21.1                                | Brunetti-Pierri <i>et al.</i> (2008) (5): MR/AU/physical anomalies<br>Mefford <i>et al.</i> (2008) (6): MR<br>Buysse <i>et al.</i> (2009) (7): MR<br>Jaillard <i>et al.</i> (2010) (8): MR<br>Christiansen <i>et al.</i> (2004) (9): CHD<br>Malhotra <i>et al.</i> (2011) (10): BD, SCZ<br>Griswold <i>et al.</i> (2012) (11): ASD<br>Rosenfeld <i>et al.</i> (2012) (2): DD/CM/ASD<br>Girirajan <i>et al.</i> (2013) (12): ASD<br><b>Total:</b>                                                       | 3/17<br>8/17<br>2/3<br>0/1<br>1/2<br>-<br>-<br>7/39<br>0/1<br><b>21/80=0.26</b>           | 1/12<br>3/5<br>0/1<br>-<br>-<br>0/2<br>1/2<br>5/30<br>4/8<br><b>14/60=0.23</b> |
| 2p16.3 ( <i>NRXN1</i> )<br>exonic del | Guilmatre <i>et al.</i> (2009) (13): ASD/MR<br>Glessner <i>et al.</i> (2009) (14): ASD<br>Kirov <i>et al.</i> (2012) (15): SCZ<br>Bradley <i>et al.</i> (2001) (16): ADHD<br>The Autism Genome Project Consortium (2007) (17): ASD<br>Ching <i>et al.</i> (2010) (18): variable phenotypes<br>Shen <i>et al.</i> (2010) (19): ASD<br>Bremer <i>et al.</i> (2011) (20): ASD<br>Sanders <i>et al.</i> /Levy <i>et al.</i> (2011) (21, 22): ASD<br>Schaaf, <i>et al.</i> (2012) (23): DD<br><b>Total:</b> | 0/3<br>0/7<br>0/3<br>1/1<br>1/1<br>4/11<br>0/1<br>0/1<br>1/4<br>3/12<br><b>10/44=0.23</b> | NA                                                                             |
| 2q23.1                                | Girirajan <i>et al.</i> (2012) (1): DD/ASD/CM                                                                                                                                                                                                                                                                                                                                                                                                                                                          | 1/2                                                                                       | NA                                                                             |
| 2q37                                  | Girirajan <i>et al.</i> (2012) (1): DD/ASD/CM                                                                                                                                                                                                                                                                                                                                                                                                                                                          | 2/3                                                                                       | 0/2                                                                            |
| 3q29                                  | Ballif <i>et al.</i> (2008) (24): MR<br>Willatt <i>et al.</i> (2005) (25): variable phenotypes<br>Mulle <i>et al.</i> (2010) (26): SCZ                                                                                                                                                                                                                                                                                                                                                                 | 5/8<br>5/5<br>1/1 del                                                                     | 2/10<br>-<br>-                                                                 |

| Locus                    | Reference                                                                                                                                                                                                                                                                                                                                                                                       | Deletions                                                             | Duplications                                                           |
|--------------------------|-------------------------------------------------------------------------------------------------------------------------------------------------------------------------------------------------------------------------------------------------------------------------------------------------------------------------------------------------------------------------------------------------|-----------------------------------------------------------------------|------------------------------------------------------------------------|
|                          | Kirov <i>et al.</i> (2012) (15): SCZ<br>Bremer <i>et al.</i> (2011) (20): ASD<br>Sanders <i>et al./Levy et al.</i> (2011) (21, 22): ASD<br>Malhotra <i>et al.</i> (2011) (4): BD<br>Girirajan <i>et al.</i> (2011) (27): DD/AU/Dyslexia<br>Girirajan <i>et al.</i> (2012) (1): DD/ASD/CM<br><b>Total:</b>                                                                                       | 1/1 del<br>1/1<br>1/1<br>1/1<br>1/1del<br>3/4del<br><b>19/23=0.83</b> | -<br>-<br>-<br>-<br>1/1dup<br>0/8dup<br>3/19=0.16                      |
| Wolf-Hirschhorn syndrome | Girirajan <i>et al.</i> (2012) (1): DD/ASD/CM                                                                                                                                                                                                                                                                                                                                                   | 1/2                                                                   | 1/1                                                                    |
| Sotos syndrome           | Girirajan <i>et al.</i> (2012) (1): DD/ASD/CM                                                                                                                                                                                                                                                                                                                                                   | 1/1                                                                   | 0/1                                                                    |
| 6p25                     | Girirajan <i>et al.</i> (2012) (1): DD/ASD/CM                                                                                                                                                                                                                                                                                                                                                   | 1/13=0.08                                                             | 0/6=0                                                                  |
| 6q16                     | Girirajan <i>et al.</i> (2012) (1): DD/ASD/CM                                                                                                                                                                                                                                                                                                                                                   | -                                                                     | 0/1                                                                    |
| WBS                      | Sanders <i>et al.</i> (2011) (22): AU<br>Van der Aa <i>et al.</i> (2009) (28): MR<br>Girirajan <i>et al.</i> (2011) (27): DD/AU/Dyslexia<br>Dixit <i>et al.</i> (2013) (29): DD/ASD/CM<br>Mulle <i>et al.</i> (in press): SCZ<br>Griswold <i>et al.</i> (2012) (11): ASD<br>Girirajan <i>et al.</i> (2012) (1): DD/ASD/CM<br>Dutly & Schinzel (1996) (30): WBS<br><b>Total :</b>                | -<br>-<br>1/1<br>-<br>-<br>-<br>6/6<br>15/15<br><b>22/22=1</b>        | 4/4<br>5/12<br>-<br>4/5<br>2/2<br>0/1<br>5/9<br>-<br><b>20/33=0.61</b> |
| 8p23.1                   | Girirajan <i>et al.</i> (2012) (1): DD/ASD/CM                                                                                                                                                                                                                                                                                                                                                   | 2/5=0.40                                                              | 2/10=0.20                                                              |
| 9q34                     | Girirajan <i>et al.</i> (2012) (1): DD/ASD/CM                                                                                                                                                                                                                                                                                                                                                   | 9/9=1                                                                 | 2/6=0.33                                                               |
| 10q23                    | Girirajan <i>et al.</i> (2012) (1): DD/ASD/CM                                                                                                                                                                                                                                                                                                                                                   | 5/13=0.38                                                             | 0/3=0                                                                  |
| 15q11.2                  | Doornbos <i>et al.</i> (2009) (31): MR<br>de Kovel <i>et al.</i> (2010) (32): epilepsy<br>Kirov <i>et al.</i> (2012) (15): SCZ<br>Shen <i>et al.</i> (2010) (19): ASD<br>Levy <i>et al.</i> (2011) (21): ASD<br>Burnside <i>et al.</i> (2011) (33) & pers. comm. 13.6.2011: DD/CM<br>Malhotra <i>et al.</i> (2011) (10): SCZ/BD/controls<br>Girirajan <i>et al.</i> (2011) (27): DD/AU/Dyslexia | 2/9<br>0/4<br>2/5<br>0/1<br>1/6<br>1/24<br>0/4<br>1/1                 | NA                                                                     |



| Locus                | Reference                                                                                                                                                                                                                                                                                                                                                                                                                                                                                                                                                                                                         | Deletions                                                                                                    | Duplications                                                                          |
|----------------------|-------------------------------------------------------------------------------------------------------------------------------------------------------------------------------------------------------------------------------------------------------------------------------------------------------------------------------------------------------------------------------------------------------------------------------------------------------------------------------------------------------------------------------------------------------------------------------------------------------------------|--------------------------------------------------------------------------------------------------------------|---------------------------------------------------------------------------------------|
|                      | Rosenfeld <i>et al.</i> (2012) (2): DD/ASD/CM<br><b>Total:</b>                                                                                                                                                                                                                                                                                                                                                                                                                                                                                                                                                    | 0/27<br><b>7/81=0.09</b>                                                                                     |                                                                                       |
| 15q13.3              | Sharp <i>et al.</i> (2008) (34): MR<br>van Bon <i>et al.</i> (2009) (35): MR<br>de Kovel <i>et al.</i> (2010) (32): epilepsy<br>Buysse <i>et al.</i> (2009) (7): MR<br>Dibbens <i>et al.</i> (2009) (36): epilepsy<br>Guilmatre <i>et al.</i> (2009) (13): MR<br>Shen <i>et al.</i> (2010) (19): ASD<br>Kirov <i>et al.</i> (2012) (15): SCZ<br>Sanders <i>et al.</i> (2011) (22): ASD<br>Malhotra <i>et al.</i> (2011) (10): SCZ/BD/controls<br>Girirajan <i>et al.</i> (2011) (27): DD/AU/Dyslexia<br>Griswold <i>et al.</i> (2012) (11): AU<br>Girirajan <i>et al.</i> (2012) (1): DD/ASD/CM<br><b>Total :</b> | 2/4<br>3/14<br>1/5<br>0/2<br>3/5<br>1/1<br>0/1<br>2/2<br>1/2<br>-<br>1/1<br>1/1<br>7/33<br><b>22/71=0.31</b> | -<br>1/1<br>-<br>-<br>-<br>0/1<br>-<br>-<br>1/1<br>0/1<br>-<br>-<br>0/11<br>2/15=0.13 |
| 15q11-13<br>(AS/PWS) | Guilmatre <i>et al.</i> (2009) (13): ASD<br>Glessner <i>et al.</i> (2009) (14): ASD<br>Ingason <i>et al.</i> (2011) (37): SCZ<br>Marshall <i>et al.</i> (2008) (38): ASD<br>Sanders <i>et al.</i> /Levy <i>et al.</i> (2011) (21, 22): ASD<br>Girirajan <i>et al.</i> (2012) (1): DD/ASD/CM<br>Butler <i>et al.</i> (1986) (39): PWS<br>Chan <i>et al.</i> (1993) (40): AS<br><b>Total:</b>                                                                                                                                                                                                                       | -<br>-<br>-<br>-<br>-<br>11/13<br>21/21PWS<br>47/47AS<br>79/81=0.98                                          | 1/1<br>2/8<br>1/1<br>2/2<br>1/1<br>10/21<br>-<br>-<br><b>17/34=0.50</b>               |
| 15q24                | Girirajan <i>et al.</i> (2012) (1): DD/ASD/CM<br>Magoulas & El-Hattab (2012) (41): 15q24 syndrome<br><b>Total:</b>                                                                                                                                                                                                                                                                                                                                                                                                                                                                                                | 5/5<br>18/18<br>23/23=1                                                                                      | 0/1<br>-<br>0/1                                                                       |
| 15q24.2-q24.3        | Girirajan <i>et al.</i> (2012) (1)                                                                                                                                                                                                                                                                                                                                                                                                                                                                                                                                                                                | 4/4                                                                                                          | 0/1                                                                                   |
| 15q25                | Girirajan <i>et al.</i> (2012) (1): DD/ASD/CM<br>Girirajan <i>et al.</i> (2013) (12): ASD<br><b>Total :</b>                                                                                                                                                                                                                                                                                                                                                                                                                                                                                                       | -<br>0/1<br>0/1                                                                                              | 1/1<br>0/1<br>1/2=0.50                                                                |
| Rubinstein-Taybi     | Girirajan <i>et al.</i> (2012) (1): DD/ASD/CM                                                                                                                                                                                                                                                                                                                                                                                                                                                                                                                                                                     | 1/1                                                                                                          | -                                                                                     |

| Locus         | Reference                                                                                                                                                                                                                                                                                                                                                                                                                                                                                                                                                                                      | Deletions                                                                                   | Duplications                                                                                        |
|---------------|------------------------------------------------------------------------------------------------------------------------------------------------------------------------------------------------------------------------------------------------------------------------------------------------------------------------------------------------------------------------------------------------------------------------------------------------------------------------------------------------------------------------------------------------------------------------------------------------|---------------------------------------------------------------------------------------------|-----------------------------------------------------------------------------------------------------|
|               | Hennekam <i>et al.</i> (1993) (42): Rubinstein-Taybi                                                                                                                                                                                                                                                                                                                                                                                                                                                                                                                                           | (99%)                                                                                       |                                                                                                     |
| 16p13.1       | Buysse <i>et al.</i> (2009) (7): MR<br>Ullmann <i>et al.</i> (2007) (43): MR/AU<br>Hannes <i>et al.</i> (2008) (44): MR<br>Kirov <i>et al.</i> (2012) (15): SCZ<br>Williams <i>et al.</i> (2010) (45): ADHD<br>Nagamani <i>et al.</i> (2011) (46): various phenotypes<br>Sanders <i>et al.</i> (2011) (22): ASD<br>Kuang <i>et al.</i> (2011) (47): Aortic aneurism<br>Malhotra <i>et al.</i> (2011) (10): controls<br>Girirajan <i>et al.</i> (2011) (27): DD,AU,Dyslexia<br>Girirajan <i>et al.</i> (2012) (1): DD/ASD/CM<br>Rosenfeld <i>et al.</i> (2012) (2): DD/ASD/CM<br><b>Totals:</b> | 0/1<br>1/3<br>0/1<br>-<br>-<br>2/3<br>1/2<br>-<br>-<br>0/2<br>-<br>5/23<br><b>9/35=0.26</b> | 1/1<br>0/2<br>1/4<br>0/1<br>1/2<br>0/7<br>2/6<br>1/2<br>0/1<br>0/2<br>3/40<br>-<br><b>9/68=0.13</b> |
| 16p11.2p12.1  | Girirajan <i>et al.</i> (2012) (1): DD/ASD/CM                                                                                                                                                                                                                                                                                                                                                                                                                                                                                                                                                  | 4/6=0.67                                                                                    | 2/5=0.40                                                                                            |
| 16p12.1       | Girirajan <i>et al.</i> (2012) (1): DD/ASD/CM                                                                                                                                                                                                                                                                                                                                                                                                                                                                                                                                                  | 1/25=0.04                                                                                   | 1/7=0.14                                                                                            |
| 16p11.2distal | Bochukova <i>et al.</i> (2010) (48): obesity<br>Bachmann-Gagescu <i>et al.</i> (2010) (49): DD, various phenotypes<br>Guha <i>et al.</i> (2013) (50): SCZ<br>Barge-Schaapveld <i>et al.</i> (2011) (51): DD<br>Bijlsma <i>et al.</i> (2009) (52): MR/CM<br>Rosenfeld <i>et al.</i> (2012) (2): DD/ASD/CM<br><b>Totals :</b>                                                                                                                                                                                                                                                                    | 0/2del<br>5/13del<br>0/2del<br>0/2 del<br>0/1del<br>7/21del<br><b>12/41=0.29</b>            | -<br>4/5dup<br>-<br>-<br>-<br>1/8dup<br><b>5/13=0.38</b>                                            |
| 16p11.2       | Walsh <i>et al.</i> (2008) (53): SCZ<br>Guilmatre <i>et al.</i> (2009) (13): SCZ/MR<br>McCarthy <i>et al.</i> (2009) (54): SCZ<br>Fernandez <i>et al.</i> (2010) (55): ASD<br>Buysse <i>et al.</i> (2009) (7): MR<br>Glessner <i>et al.</i> (2009) (14): ASD<br>Grozeva <i>et al.</i> (2010) (56): BD<br>Kirov <i>et al.</i> (2012) (15): SCZ<br>Shen <i>et al.</i> (2010) (19): ASD<br>Bremer <i>et al.</i> (2011) (20): ASD                                                                                                                                                                  | -<br>2/3<br>-<br>2/3<br>0/3<br>5/5<br>-<br>-<br>-<br>-                                      | 0/2<br>1/3<br>0/5<br>1/3<br>1/2<br>1/8<br>1/1<br>1/2<br>0/1<br>0/1                                  |

| Locus                                        | Reference                                                                                                                                                                                                                                                                                                                                                                                                                                                                                                                                                                                                                                                   | Deletions                                                                                                     | Duplications                                                  |
|----------------------------------------------|-------------------------------------------------------------------------------------------------------------------------------------------------------------------------------------------------------------------------------------------------------------------------------------------------------------------------------------------------------------------------------------------------------------------------------------------------------------------------------------------------------------------------------------------------------------------------------------------------------------------------------------------------------------|---------------------------------------------------------------------------------------------------------------|---------------------------------------------------------------|
|                                              | Sanders <i>et al.</i> (2011) (22): ASD<br>Shinawi <i>et al.</i> (2010) (57): DD/CM<br>Malhotra <i>et al.</i> (2011) (10): BD/SZ/controls<br>Girirajan <i>et al.</i> (2011) (27): DD,ASD,Dyslexia<br>Griswold <i>et al.</i> (2012) (11): AU<br>Rosenfeld <i>et al.</i> (2012) (2): DD/ASD/CM<br><b>Totals :</b>                                                                                                                                                                                                                                                                                                                                              | 7/8<br>8/10<br>-<br>-<br>1/1<br>33/47<br>58/80=0.72                                                           | 4/6<br>3/5<br>1/2<br>3/3<br>1/2<br>7/30<br><b>25/76=0.33</b>  |
| 17p13.3(YWHAE)                               | Girirajan <i>et al.</i> (2012) (1): DD/ASD/CM                                                                                                                                                                                                                                                                                                                                                                                                                                                                                                                                                                                                               | 3/3                                                                                                           | 4/8=0.50                                                      |
| Smith Magenis/<br>Potocki Lupski<br>Syndrome | Girirajan <i>et al.</i> (2012) (1): DD/ASD/CM<br>Girirajan <i>et al.</i> (2013) (12): ASD<br>Smith <i>et al.</i> (1999) (58): no specific numbers given<br>Totals:                                                                                                                                                                                                                                                                                                                                                                                                                                                                                          | 4/4<br>-<br>“100%”<br>100%                                                                                    | 4/4<br>1/1<br>-<br>5/5=1                                      |
| NF1                                          | Girirajan <i>et al.</i> (2012) (1)                                                                                                                                                                                                                                                                                                                                                                                                                                                                                                                                                                                                                          | -                                                                                                             | 1/3                                                           |
| 17q12                                        | Moreno-De-Luca <i>et al.</i> (2010) (59): ASD/SCZ, others<br>Rosenfeld <i>et al.</i> (2012) (2): DD/ASD/CM<br>Girirajan <i>et al.</i> (2013) (12): ASD<br><b>Totals:</b>                                                                                                                                                                                                                                                                                                                                                                                                                                                                                    | 7/8<br>5/9<br>1/2<br><b>13/19=0.68</b>                                                                        | -<br>2/9<br>-<br>2/9=0.22                                     |
| 17q21.31                                     | Girirajan <i>et al.</i> (2012) (1): DD/ASD/CM                                                                                                                                                                                                                                                                                                                                                                                                                                                                                                                                                                                                               | 10/10=1                                                                                                       | 1/2                                                           |
| 17q23                                        | Girirajan <i>et al.</i> (2012) (1): DD/ASD/CM                                                                                                                                                                                                                                                                                                                                                                                                                                                                                                                                                                                                               | 1/1                                                                                                           | 1/1                                                           |
| 19p13.12                                     | Girirajan <i>et al.</i> (2012) (1): DD/ASD/CM                                                                                                                                                                                                                                                                                                                                                                                                                                                                                                                                                                                                               | 2/2                                                                                                           | NA                                                            |
| 22q11.21                                     | Buysse <i>et al.</i> (2009) (7): MR<br>De Kovel <i>et al.</i> (2010) (32): epilepsy<br>Marshall <i>et al.</i> (2008) (38): ASD<br>Xu <i>et al.</i> (2008) (60): SCZ<br>Swillen <i>et al.</i> (1998) (61): VCFS/DiGeorge Syndrome<br>Digilio <i>et al.</i> (1997) (62): MR/DD<br>Smith and Robson (1999) (58): VCFS/DiGeorge Syndrome<br>Ryan <i>et al.</i> (1997) (63): DiGeorge Syndrome<br>Thompson and Davies (1998) (64): VCFS/DiGeorge Syndrome<br>Driscoll <i>et al.</i> (1993) (65): VCFS/DiGeorge Syndrome<br>Worthington <i>et al.</i> (1998) (66): CHD<br>Sanders <i>et al.</i> (2011) (22): ASD<br>Girirajan <i>et al.</i> (2012) (1): DD/ASD/CM | 5/5<br>1/1<br>1/1<br>3/3<br>85/97<br>26/33<br>33.5/36.5<br>204/285<br>37/41<br>57/63<br>13/15<br>1/1<br>16/20 | -<br>-<br>-<br>-<br>-<br>-<br>-<br>-<br>-<br>-<br>-<br>-<br>- |

| Locus           | Reference                                                       | Deletions                     | Duplications        |
|-----------------|-----------------------------------------------------------------|-------------------------------|---------------------|
|                 | Rosenfeld <i>et al.</i> (2012) (2): DD/ASD/CM<br><b>Totals:</b> | -<br><b>482.5/601.5 =0.80</b> | 12/47<br>12/47=0.26 |
| 22q11.2 distal  | Girirajan <i>et al.</i> (2012) (1): DD/ASD/CM                   | 8/8=1                         | 1/6=0.17            |
| Phelan-McDermid | Girirajan <i>et al.</i> (2012) (1): DD/ASD/CM                   | 17/18=0.94                    | 0/2                 |

ADHD, attention-deficit/hyperactivity disorder; AS, Angelman syndrome; ASD, autism spectrum disorder; AU, autism; BD, bipolar disorder; CHD, congenital heart disease; CM, congenital malformations; CNV, copy number variant; DD, developmental delay; MR, mental retardation; PWS, Prader-Willi syndrome; SCZ, schizophrenia; VCFS, velo-cardio-facial syndrome; WBS, Williams-Beuren syndrome.

**Table S4.** Summary of the frequencies and penetrance of CNVs in the different phenotypes, and their 95% confidence intervals (95% CI). The *p*-value refers to the difference in the frequencies between SCZ and the group of DD/ASD/CM. All significant ones are for frequencies that are higher in the DD/ASD/CM group.

| Locus      | Position           | Frequency %, 95% CI  |                       |                       |                        | <i>p</i> -value<br>SCZ vs.<br>DD/ASD/<br>CM | Penetrance %, 95% CI |                |                | Selection<br>Coefficient |
|------------|--------------------|----------------------|-----------------------|-----------------------|------------------------|---------------------------------------------|----------------------|----------------|----------------|--------------------------|
|            |                    | Controls             | SCZ                   | DD/ASD<br>/CM         | General<br>Population  |                                             | SCZ                  | DD/ASD<br>/CM  | Total          |                          |
| 1p36 del   | chr1:0,00-10,07    | 0.000<br>0-0.021     | 0.000<br>0-0.028      | 0.239<br>0.192-0.298  | 0.0096<br>0.0076-0.032 | 5.9×10 <sup>-7</sup>                        | 0<br>0-3.6           | 100<br>23-100  | 100<br>23-100  | 0.82                     |
| 1q21.1 del | chr1:146,57-147,39 | 0.021<br>0.013-0.034 | 0.173<br>0.123-0.243  | 0.292<br>0.225-0.379  | 0.0331<br>0.023-0.05   | ns                                          | 5.2<br>2.5-11        | 35<br>18-67    | 40<br>20-78    | 0.26                     |
| 1q21.1 dup | chr1:146,57-147,39 | 0.037<br>0.025-0.055 | 0.129<br>0.084-0.197  | 0.205<br>0.162-0.26   | 0.0451<br>0.031-0.065  | ns                                          | 2.9<br>1.3-6.3       | 18<br>10-33    | 21<br>11-39    | 0.23                     |
| NRXN1 del  | chr2:50,14-51,26   | 0.020<br>0.011-0.037 | 0.176<br>0.125-0.247  | 0.181<br>0.104-0.316  | 0.0276<br>0.016-0.05   | ns                                          | 6.4<br>2.5-8.3       | 26<br>16-80    | 33<br>18-88    | 0.23                     |
| 2q23.1 del | chr2:148,72-149,29 | 0.000<br>0-0.021     | 0.007<br>0.0012-0.041 | 0.061<br>0.039-0.094  | 0.0025<br>0.0016-0.024 | 0.014                                       | 2.9<br>0-26          | 97<br>6.5-100  | 100<br>6.5-100 |                          |
| 2q37 del   | chr2:239,71-242,47 | 0.000<br>0-0.021     | 0.000<br>0-0.029      | 0.052<br>0.032-0.083  | 0.0021<br>0.0013-0.024 | 0.0054                                      | 0<br>0-23            | 100<br>5.5-100 | 100<br>5.5-100 |                          |
| 2q37 dup   | chr2:239,71-242,47 | 0.000<br>0-0.021     | 0.000<br>0-0.029      | 0.006<br>0.0016-0.022 | 0.0002<br>0-0.021      | ns                                          | 0<br>0-100           | 100<br>0-100   | 100<br>0-100   |                          |

| Locus               | Position           | Frequency %, 95% CI   |                       |                       |                             | <i>p</i> -value<br>SCZ vs.<br>DD/ASD/<br>CM | Penetrance %, 95% CI |                |                | Selection<br>Coefficient |
|---------------------|--------------------|-----------------------|-----------------------|-----------------------|-----------------------------|---------------------------------------------|----------------------|----------------|----------------|--------------------------|
|                     |                    | Controls              | SCZ                   | DD/ASD<br>/CM         | General<br>Population       |                                             | SCZ                  | DD/ASD<br>/CM  | Total          |                          |
| 3q29 del            | chr3:195,73-197,34 | 0.001<br>0-0.0055     | 0.082<br>0.049-0.138  | 0.061<br>0.039-0.094  | 0.0046<br>0.002-0.01        | ns                                          | 18<br>4.7-67         | 53<br>15-100   | 71<br>20-100   | 0.83                     |
| 3q29 dup            | chr3:195,73-197,34 | 0.000<br>0-0.021      | 0.000<br>0-0.029      | 0.055<br>0.035-0.087  | 0.0022<br>0.0014-0.024      | 0.003                                       | 0<br>0-21            | 100<br>5.9-100 | 100<br>5.9-100 | 0.16                     |
| Wolf-Hirschhorn del | chr4:1,53-2,03     | 0.000<br>0-0.021      | 0.000<br>0-0.029      | 0.052<br>0.032-0.083  | 0.0021<br>0.0013-0.024      | 0.0054                                      | 0<br>0-23            | 100<br>5.4-100 | 100<br>5.4-100 |                          |
| Wolf-Hirschhorn dup | chr4:1,53-2,03     | 0.000<br>0-0.021      | 0.000<br>0-0.029      | 0.012<br>0.0046-0.031 | 0.0005<br>0.0002-0.022      | ns                                          | 0<br>0-100           | 100<br>1-100   | 100<br>1-100   |                          |
| Sotos syndrome del  | chr5:175,72-177,06 | 0.000<br>0-0.021      | 0.000<br>0-0.029      | 0.043<br>0.026-0.072  | 0.0017<br>0.001-0.023       | 0.015                                       | 0<br>0-28            | 100<br>4.5-100 | 100<br>4.5-100 |                          |
| Sotos syndrome dup  | chr5:175,72-177,06 | 0.000<br>0-0.021      | 0.007<br>0.0012-0.041 | 0.012<br>0.0026-0.031 | 0.0006<br>0.0001-0.022      | ns                                          | 13<br>0-100          | 87<br>0.5-100  | 100<br>0.5-100 |                          |
| 6p25 del            | chr6:0,16-6,06     | 0.000<br>0-0.021      | 0.000<br>0-0.029      | 0.071<br>0.047-0.106  | 0.0028<br>0.0019-0.024      | 0.0007                                      | 0<br>0-15            | 100<br>7.7-100 | 100<br>7.7-100 | 0.08                     |
| 6p25 dup            | chr6:0,16-6,06     | 0.000<br>0-0.021      | 0.000<br>0-0.029      | 0.037<br>0.021-0.065  | 0.0015<br>0.0008-0.023      | 0.0024                                      | 0<br>0-35            | 100<br>3.7-100 | 100<br>3.7-100 | 0                        |
| 6q16 (SIM1) del     | chr6:100,84-100,91 | 0.000<br>0-0.021      | 0.000<br>0-0.029      | 0.004<br>0.0007-0.024 | 0.0002<br>0.00003-<br>0.021 | ns                                          | 0<br>0-100           | 100<br>0-100   | 100<br>0-100   |                          |
| 6q16 (SIM1) dup     | chr6:100,84-100,91 | 0.006<br>0.0009-0.032 | 0.000<br>0-0.029      | 0.004<br>0.0007-0.024 | 0.0055<br>0.0008-0.032      | ns                                          | 0<br>0-33            | 3.1<br>0-100   | 3.1<br>0-100   |                          |
| WBS del             | chr7:72,74-74,14   | 0.000<br>0-0.021      | 0.000<br>0-0.029      | 0.255<br>0.206-0.316  | 0.0102                      | $4.6 \times 10^{-13}$                       | 0<br>0-3.5           | 100<br>25-100  | 100<br>25-100  | 1                        |
| WBS dup             | chr7:72,74-74,14   | 0.006<br>0.0016-0.021 | 0.066<br>0.039-0.11   | 0.120<br>0.088-0.164  | 0.011<br>0.0054-0.028       | ns                                          | 6.0<br>1.4-20        | 44<br>13-100   | 50<br>14-100   | 0.61                     |
| 8p23.1 del          | chr8:8,09-11,89    | 0.000<br>0-0.021      | 0.007<br>0.0013-0.042 | 0.055<br>0.035-0.087  | 0.0023<br>0.0014-0.024      | 0.02                                        | 3.3<br>0-30          | 97<br>5.9-100  | 100<br>5.9-100 | 0.4                      |
| 8p23.1 dup          | chr8:8,09-11,89    | 0.000<br>0-0.021      | 0.000<br>0-0.029      | 0.074<br>0.05-0.11    | 0.0029<br>0.002-0.025       | 0.0004                                      | 0<br>0-14            | 100<br>8.1-100 | 100<br>8.1-100 | 0.2                      |
| 9q34 del            | chr9:137,81-141,08 | 0.000<br>0-0.021      | 0.000<br>0-0.029      | 0.055<br>0.035-0.087  | 0.0022<br>0.0014-0.024      | 0.003                                       | 0<br>0-21            | 100<br>5.9-100 | 100<br>5.9-100 | 1                        |

| Locus                           | Position           | Frequency %, 95% CI    |                       |                       |                             | <i>p</i> -value<br>SCZ vs.<br>DD/ASD/<br>CM | Penetrance %, 95% CI |                |                | Selection<br>Coefficient |
|---------------------------------|--------------------|------------------------|-----------------------|-----------------------|-----------------------------|---------------------------------------------|----------------------|----------------|----------------|--------------------------|
|                                 |                    | Controls               | SCZ                   | DD/ASD<br>/CM         | General<br>Population       |                                             | SCZ                  | DD/ASD<br>/CM  | Total          |                          |
| 9q34 dup                        | chr9:137,81-141,08 | 0.000<br>0-0.021       | 0.000<br>0-0.029      | 0.025<br>0.013-0.049  | 0.0010<br>0.0005-0.022      | ns                                          | 0<br>0-56            | 100<br>2.3-100 | 100<br>2.3-100 | 0.33                     |
| 10q23 del                       | chr10:81,96-88,80  | 0.000<br>0-0.021       | 0.000<br>0-0.029      | 0.086<br>0.06-0.124   | 0.0034<br>0.0024-0.025      | 0.000089                                    | 0<br>0-12            | 100<br>9.5-100 | 100<br>9.5-100 | 0.38                     |
| 10q23 dup                       | chr10:81,96-88,80  | 0.000<br>0-0.021       | 0.015<br>0.0041-0.054 | 0.015<br>0.0063-0.035 | 0.0008<br>0.0003-0.022      | ns                                          | 19<br>0-100          | 81<br>1.1-100  | 100<br>1.1-100 |                          |
| 15q11.2 del                     | chr15:22,80-23,09  | 0.277<br>0.243-0.315   | 0.594<br>0.496-0.712  | 0.808<br>0.705-0.926  | 0.3019<br>0.264-0.343       | 0.0077                                      | 2.0<br>1.4-2.7       | 11<br>8.2-14   | 13<br>9.6-17   | 0.09                     |
| Prader-<br>Willi/Angelman del   | chr15:24,82-28,43  | 0.000<br>0-0.021       | 0.000<br>0-0.029      | 0.184<br>0.143-0.237  | 0.0074<br>0.0057-0.003      | $1.5 \times 10^{-10}$                       | 0<br>0-5             | 100<br>19-100  | 100<br>19-100  | 0.98                     |
| Prader-<br>Willi/Angelman dup   | chr15:24,82-28,43  | 0.0083<br>0.0035-0.019 | 0.079<br>0.045-0.138  | 0.252<br>0.203-0.313  | 0.0187<br>0.012-0.032       | 0.00003                                     | 4.2<br>1.4-12        | 54<br>25-100   | 58<br>26-100   | 0.5                      |
| 15q13.3 del                     | chr15:31,13-32,48  | 0.019<br>0.012-0.031   | 0.140<br>0.096-0.205  | 0.261<br>0.211-0.323  | 0.0296<br>0.021-0.044       | 0.004                                       | 4.7<br>2.2-9.9       | 35<br>19-62    | 40<br>21-72    | 0.31                     |
| 15q13.3 dup                     | chr15:31,13-32,48  | 0.039<br>0.019-0.081   | 0.074<br>0.04-0.136   | 0.083<br>0.057-0.12   | 0.0413<br>0.021-0.083       | ns                                          | 1.8<br>0.5-6.6       | 8.0<br>2.7-23  | 9.8<br>3.2-30  | 0.13                     |
| 15q13.3 smaller<br>(CHRNA7) del | chr15:32,01-32,45  | 0.000<br>0-0.021       | 0.015<br>0.004-0.054  | 0.030<br>0.015-0.062  | 0.0013<br>0.0006-0.023      | ns                                          | 11<br>0.2-84         | 89<br>2.6-100  | 100<br>2.8-100 |                          |
| 15q13.3 smaller<br>(CHRNA7) dup | chr15:32,01-32,45  | 0.733<br>0.618-0.869   | 0.616<br>0.497-0.763  | 0.556<br>0.468-0.66   | 0.7247<br>0.61-0.86         | ns                                          | 0.9<br>0.6-1.2       | 3.1<br>2.2-4.3 | 4.0<br>2.8-5.5 |                          |
| 15q24 del                       | chr15:72,91-74,41  | 0.000<br>0-0.021       | 0.000<br>0-0.029      | 0.025<br>0.013-0.049  | 0.0010<br>0.0005-0.022      | ns                                          | 0<br>0-56            | 100<br>2.3-100 | 100<br>2.3-100 | 1                        |
| 15q24 dup                       | chr15:72,91-74,41  | 0.000<br>0-0.021       | 0.000<br>0-0.029      | 0.012<br>0.0046-0.031 | 0.0005<br>0.0002-0.022      | ns                                          | 0<br>0-100           | 100<br>0.9-100 | 100<br>0.9-100 |                          |
| 15q24.2q24.5 del                | chr15:75,97-78,20  | 0.000<br>0-0.021       | 0.000<br>0-0.029      | 0.015<br>0.0063-0.035 | 0.0006<br>0.00025-<br>0.022 | ns                                          | 0<br>0-100           | 100<br>1.2-100 | 100<br>1.2-100 |                          |
| 15q24.2q24.5 dup                | chr15:75,97-78,20  | 0.000<br>0-0.021       | 0.000<br>0-0.029      | 0.018<br>0.0063-0.035 | 0.0007<br>0.0002-0.022      | ns                                          | 0<br>0-100           | 100<br>1.2-100 | 100<br>1.2-100 |                          |
| 15q25 del                       | chr15:83,18-84,74  | 0.000<br>0-0.021       | 0.000<br>0-0.029      | 0.009<br>0.0025-0.032 | 0.0003<br>0.0001-0.022      | ns                                          | 0<br>0-100           | 100<br>0.5-100 | 100<br>0.5-100 |                          |

| Locus                    | Position          | Frequency %, 95% CI   |                       |                       |                             | <i>p</i> -value<br>SCZ vs.<br>DD/ASD/<br>CM | Penetrance %, 95% CI |                |                | Selection<br>Coefficient |
|--------------------------|-------------------|-----------------------|-----------------------|-----------------------|-----------------------------|---------------------------------------------|----------------------|----------------|----------------|--------------------------|
|                          |                   | Controls              | SCZ                   | DD/ASD<br>/CM         | General<br>Population       |                                             | SCZ                  | DD/ASD<br>/CM  | Total          |                          |
| 15q25 dup                | chr15:83,18-84,74 | 0.000<br>0-0.021      | 0.000<br>0-0.029      | 0.017<br>0.0066-0.044 | 0.0007<br>0.00026-<br>0.022 | ns                                          | 0<br>0-100           | 100<br>1.2-100 | 100<br>1.2-100 |                          |
| 16p13.11 del             | chr16:15,51-16,30 | 0.039<br>0.019-0.081  | 0.074<br>0.04-0.136   | 0.150<br>0.114-0.198  | 0.044<br>0.023-0.086        | 0.045                                       | 1.7<br>0.5-5.9       | 14<br>5.3-34   | 15<br>5.8-40   | 0.26                     |
| 16p13.11 dup             | chr16:15,51-16,30 | 0.134<br>0.109-0.164  | 0.308<br>0.224-0.424  | 0.301<br>0.247-0.367  | 0.1426<br>0.116-0.175       | ns                                          | 2.2<br>1.3-3.7       | 8.4<br>5.7-13  | 10.6<br>7-17   | 0.13                     |
| 16p11.2p12.1 del         | chr16:21,53-29,10 | 0.000<br>0-0.021      | 0.000<br>0-0.029      | 0.061<br>0.039-0.094  | 0.0025<br>0.0016-0.024      | 0.002                                       | 0<br>0-19            | 100<br>6.5-100 | 100<br>6.5-100 | 0.67                     |
| 16p11.2p12.1 dup         | chr16:21,53-29,10 | 0.000<br>0-0.021      | 0.000<br>0-0.029      | 0.043<br>0.026-0.072  | 0.0017<br>0.001-0.023       | 0.015                                       | 0<br>0-28            | 100<br>4.4-100 | 100<br>4.4-100 | 0.4                      |
| 16p12.1 del              | chr16:21,94-22,46 | 0.05<br>0.026-0.095   | 0.178<br>0.120-0.265  | 0.187<br>0.146-0.24   | 0.0571<br>0.032-0.1         | ns                                          | 3.1<br>1.2-8.3       | 13<br>5.7-30   | 16<br>6.9-38   | 0.04                     |
| 16p12.1 dup              | chr16:21,94-22,46 | 0.05<br>0.026-0.095   | 0.037<br>0.016-0.087  | 0.049<br>0.03-0.07    | 0.0502<br>0.027-0.094       | ns                                          | 0.7<br>0.2-3.3       | 3.9<br>1.3-11  | 4.8<br>1.5-14  | 0.14                     |
| 16p11.2 distal del       | chr16:28,82-29,05 | 0.018<br>0.0076-0.043 | 0.063<br>0.037-0.108  | 0.138<br>0.103-0.184  | 0.0237<br>0.012-0.049       | 0.01                                        | 2.6<br>0.8-9.2       | 23<br>8.4-63   | 26<br>9.2-72   | 0.29                     |
| 16p11.2 distal dup       | chr16:28,82-29,05 | 0.056<br>0.03-0.103   | 0.037<br>0.016-0.087  | 0.075<br>0.051-0.111  | 0.0565<br>0.031-0.103       | ns                                          | 0.7<br>0.2-2.8       | 5.3<br>2-14    | 6.0<br>2.2-17  | 0.38                     |
| 16p11.2 del              | chr16:29,64-30,20 | 0.041<br>0.028-0.06   | 0.030<br>0.013-0.07   | 0.439<br>0.373-0.516  | 0.0570<br>0.042-0.078       | $3.9 \times 10^{-20}$                       | 0.5<br>0.2-1.7       | 31<br>19-50    | 31<br>19-52    | 0.72                     |
| 16p11.2 dup              | chr16:29,64-30,20 | 0.030<br>0.019-0.047  | 0.346<br>0.268-0.447  | 0.280<br>0.229-0.343  | 0.0433<br>0.032-0.063       | ns                                          | 8.0<br>4.3-14        | 26<br>18-43    | 34<br>22-57    | 0.33                     |
| Rubinstein-Taybi del     | chr16:3,78-3,93   | 0.006<br>0.0001-0.032 | 0.000<br>0-0.029      | 0.031<br>0.017-0.057  | 0.0065<br>0.0008-0.033      | 0.04                                        | 0<br>0-37            | 19<br>2-100    | 19<br>2-100    | 0.99                     |
| 17p13.3 (YWHAE)<br>del   | chr17:1,25-1,30   | 0.006<br>0.0001-0.032 | 0.000<br>0-0.029      | 0.021<br>0.01-0.044   | 0.0062<br>0.0005-0.032      | ns                                          | 0<br>0-59            | 14<br>1.2-100  | 14<br>1.2-100  |                          |
| 17p13.3 (YWHAE)<br>dup   | chr17:1,25-1,30   | 0.017<br>0.0059-0.05  | 0.022<br>0.0074-0.065 | 0.040<br>0.023-0.068  | 0.0178<br>0.0066-0.051      | ns                                          | 1.3<br>0.1-9.8       | 9.0<br>1.8-41  | 10.3<br>1.9-51 | 0.5                      |
| 17p13.3(PAFAH1B1)<br>del | chr17:2,49-2,59   | 0.000<br>0-0.021      | 0.000<br>0-0.029      | 0.025<br>0.013-0.049  | 0.0010<br>0.0005-0.022      | ns                                          | 0<br>0-56            | 100<br>2.3-100 | 100<br>2.3-100 |                          |

| Locus                    | Position          | Frequency %, 95% CI   |                       |                       |                             | <i>p</i> -value<br>SCZ vs.<br>DD/ASD/<br>CM | Penetrance %, 95% CI |                |                | Selection<br>Coefficient |
|--------------------------|-------------------|-----------------------|-----------------------|-----------------------|-----------------------------|---------------------------------------------|----------------------|----------------|----------------|--------------------------|
|                          |                   | Controls              | SCZ                   | DD/ASD<br>/CM         | General<br>Population       |                                             | SCZ                  | DD/ASD<br>/CM  | Total          |                          |
| 17p13.3(PAFAH1B1)<br>dup | chr17:2,49-2,59   | 0.006<br>0.0001-0.032 | 0.000<br>0-0.029      | 0.028<br>0.015-0.053  | 0.0064<br>0.0007-0.032      | ns                                          | 0<br>0-42            | 17<br>1.8-100  | 17<br>1.8-100  |                          |
| Smith-Magenis del        | chr17:16,82-18,28 | 0.000<br>0-0.021      | 0.000<br>0-0.029      | 0.095<br>0.067-0.135  | 0.0038<br>0.0027-0.026      | 0.000032                                    | 0<br>0-11            | 100<br>10-100  | 100<br>10-100  | 1                        |
| Potocki-Lupski (dup)     | chr17:16,82-18,28 | 0.000<br>0-0.021      | 0.007<br>0.0013-0.042 | 0.077<br>0.052-0.114  | 0.0031<br>0.0021-0.025      | 0.0021                                      | 2.4<br>0.1-20        | 98<br>8-100    | 100<br>8-100   | 1                        |
| NF1 del                  | chr17:29,10-30,28 | 0.006<br>0.0001-0.032 | 0.000<br>0-0.029      | 0.080<br>0.055-0.117  | 0.0085<br>0.0023-0.036      | 0.00027                                     | 0<br>0-13            | 38<br>6-100    | 38<br>6-100    |                          |
| NF1 dup                  | chr17:29,10-30,28 | 0.000<br>0-0.021      | 0.007<br>0.0013-0.042 | 0.107<br>0.077-0.149  | 0.0044<br>0.003-0.027       | 0.00013                                     | 1.7<br>0-14          | 98<br>12-100   | 100<br>12-100  |                          |
| 17q12 del                | chr17:34,81-36,20 | 0.005<br>0.0021-0.014 | 0.036<br>0.015-0.084  | 0.087<br>0.061-0.125  | 0.009<br>0.0046-0.019       | ns                                          | 4.0<br>0.8-18        | 39<br>13-100   | 43<br>14-100   | 0.68                     |
| 17q12 dup                | chr17:34,81-36,20 | 0.022<br>0.0085-0.057 | 0.045<br>0.021-0.098  | 0.111<br>0.081-0.153  | 0.0262<br>0.012-0.061       | 0.029                                       | 1.7<br>0.3-8.5       | 17<br>5.3-53   | 19<br>5.6-61   | 0.22                     |
| 17q21.31 del             | chr17:43,70-44,18 | 0.000<br>0-0.021      | 0.000<br>0-0.029      | 0.129<br>0.096-0.174  | 0.0052<br>0.0038-0.027      | 10 <sup>-6</sup>                            | 0<br>0-7.6           | 100<br>14-100  | 100<br>14-100  | 1                        |
| 17q21.31 dup             | chr17:43,70-44,18 | 0.000<br>0-0.021      | 0.007<br>0.0013-0.042 | 0.015<br>0.0064-0.035 | 0.0007<br>0.0003-0.022      | ns                                          | 10.8<br>0.1-100      | 89<br>1.2-100  | 100<br>1.3-100 |                          |
| 17q23 del                | chr17:58,25-60,29 | 0.000<br>0-0.021      | 0.000<br>0-0.029      | 0.018<br>0.0082-0.039 | 0.0007<br>0.0003-0.022      | ns                                          | 0<br>0-88            | 100<br>1.5-100 | 100<br>1.5-100 |                          |
| 17q23 dup                | chr17:58,25-60,29 | 0.000<br>0-0.021      | 0.000<br>0-0.029      | 0.003<br>0.0005-0.017 | 0.0001<br>0.00002-<br>0.021 | ns                                          | 0<br>0-100           | 100<br>0-100   | 100<br>0-100   |                          |
| 19p13.12 del             | chr19:13,08-16,70 | 0.000<br>0-0.021      | 0.000<br>0-0.029      | 0.04<br>0.023-0.068   | 0.0016<br>0.0009-0.023      | 0.014                                       | 0<br>0-32            | 100<br>4-100   | 100<br>4-100   |                          |
| DiGeorge/VCFS del        | chr22:19,02-20,26 | 0.000<br>0-0.005      | 0.293<br>0.226-0.38   | 0.537<br>0.463-0.662  | 0.0244<br>0.021-0.035       | 0.00005                                     | 12<br>6.5-18         | 88<br>53-100   | 100<br>60-100  | 0.8                      |
| 22q11.21 dup             | chr22:19,02-20,26 | 0.075<br>0.051-0.111  | 0.019<br>0.0064-0.056 | 0.280<br>0.237-0.331  | 0.0824<br>0.058-0.119       | 4.5×10 <sup>-13</sup>                       | 0<br>0-1             | 14<br>8-23     | 14<br>8-24     | 0.26                     |
| 22q11.2distal del        | chr22:21,91-23,65 | 0.000<br>0-0.021      | 0.000<br>0-0.029      | 0.111<br>0.076-0.163  | 0.0044<br>0.003-0.027       | 0.000012                                    | 0<br>0-9.5           | 100<br>11-100  | 100<br>11-100  | 1                        |



| Locus                  | Position          | Frequency %, 95% CI  |                       |                      |                        | <i>p</i> -value<br>SCZ vs.<br>DD/ASD/<br>CM | Penetrance %, 95% CI |                |                | Selection<br>Coefficient |
|------------------------|-------------------|----------------------|-----------------------|----------------------|------------------------|---------------------------------------------|----------------------|----------------|----------------|--------------------------|
|                        |                   | Controls             | SCZ                   | DD/ASD<br>/CM        | General<br>Population  |                                             | SCZ                  | DD/ASD<br>/CM  | Total          |                          |
| 22q11.2distal dup      | chr22:21,91-23,65 | 0.017<br>0.0058-0.05 | 0.007<br>0.0012-0.041 | 0.077<br>0.049-0.123 | 0.0191<br>0.0075-0.053 | 0.0032                                      | 0<br>0-5.5           | 16<br>3.7-66   | 17<br>3.7-72   | 0.17                     |
| Phelan-McDermid<br>del | chr22:43,00-51,16 | 0.000<br>0-0.021     | 0.000<br>0-0.029      | 0.181<br>0.14-0.233  | 0.0072<br>0.0056-0.03  | $2.4 \times 10^{-9}$                        | 0<br>0-5.2           | 100<br>19-100  | 100<br>19-100  | 0.94                     |
| 22q13 dup              | chr22:43,00-51,16 | 0.000<br>0-0.021     | 0.000<br>0-0.029      | 0.009<br>0.003-0.027 | 0.0004<br>0.0001-0.021 | ns                                          | 0<br>0-100           | 100<br>0.6-100 | 100<br>0.6-100 |                          |

See Table S2 for abbreviations.

**Table S5.** Comparison of penetrance estimates from this study with those from the main previous publications. “Vassos” refers to Vassos *et al.* (67); “Rosenfeld” refers to the study by Rosenfeld *et al.* (2).

| <b>Locus</b>       | <b>Current Study Penetrance SCZ</b> | <b>Vassos Penetrance SCZ</b> | <b>Current Study Penetrance DD/CM/ASD</b> | <b>Rosenfeld Penetrance DD/ASD/CM</b> |
|--------------------|-------------------------------------|------------------------------|-------------------------------------------|---------------------------------------|
| 1q21.1 del         | 5.2 (2.5-11)                        | 6.1 (3-12)                   | 35 (18-67)                                | 37 (23-55)                            |
| 1q21.1 dup         | 2.9 (1.3-6.3)                       |                              | 18 (10-33)                                | 29 (17-47)                            |
| NRXN1 del          | 6.4 (2.5-8.3)                       | 2.0 (1-4)                    | 26 (16-80)                                |                                       |
| 15q11.2 del        | 2.0 (1.4-2.7)                       | 2.0 (1-3)                    | 10.7 (8.2-14)                             | 10 (8.4-13)                           |
| 15q13.3 del        | 4.7 (2.2-9.9)                       | 7.4 (3-16)                   | 35 (19-62)                                |                                       |
| 16p13.11 del       | 1.7 (0.5-5.9)                       |                              | 14 (5.3-34)                               | 13 (7.9-21)                           |
| 16p13.11 dup       | 2.2 (1.3-3.7)                       | 2.4 (1-4)                    | 8.4 (5.7-13)                              |                                       |
| 16p12.1 del        | 3.1 (1.2-8.3)                       |                              | 13 (5.7-30)                               | 12 (7.9-19)                           |
| 16p11.2 distal del | 2.6 (0.8-9.2)                       |                              | 23 (8.4-63)                               | 62 (27-94)                            |
| 16p11.2 distal dup | 0.7 (0.2-2.8)                       |                              | 5.3 (2-14)                                | 11 (6.3-20)                           |
| 16p11.2 del        | 0.5 (0.2-1.7)                       |                              | 31 (19-50)                                | 47 (32-64)                            |
| 16p11.2 dup        | 8.0 (4.3-14)                        | 6.9 (3-14)                   | 26 (18-43)                                | 27 (17-41)                            |
| 17q12 del          | 4.0 (0.8-18)                        |                              | 39 (13-100)                               | 34 (14-70)                            |
| 17q12 dup          | 1.7 (0.3-8.5)                       |                              | 17 (5.3-53)                               | 21 (11-40)                            |
| DiGeorge/VCFS del  | 12 (6.5-18)                         | 55 (18-97)                   | 88 (53-100)                               |                                       |
| 22q11.21 dup       | 0.2 (0-1)                           |                              | 14 (8-23)                                 | 22 (15-32)                            |

See Table S2 for abbreviations.

**Table S6.** Presence of a “second hit” CNV in carriers of a selected list of CNV loci that have been implicated in SCZ. A “second hit” is defined as a CNV of >500 kb in size (deletion or duplication) that is found in <0.1% of the control populations used in this study, or a CNV from the list in Table S2, even if smaller than 500 kb (following the definition used by Girirajan *et al.* (1)). The analysis of second hits was performed on the 13,465 cases and 17,873 controls (listed under D in Table S2): 6882 cases / 11,255 controls from the “Current sample” + 3391 cases / 3181 controls from the ISC study + 3192 cases / 3437 controls from the MGS study.

| <b>Locus</b>                  | <b>% Double Hits<br/>(N_double<br/>hits/N_carriers,<br/>SCZ)</b> | <b>% Double Hits<br/>(N_double<br/>hits/N_carriers,<br/>Controls)</b> | <b>% Double Hits<br/>in DD/ASD/CM<br/>from ref (1)</b> |
|-------------------------------|------------------------------------------------------------------|-----------------------------------------------------------------------|--------------------------------------------------------|
| 1q21.1 del                    | 16.7% (4/24)                                                     | 0% (0/6)                                                              | 8% (8/100)                                             |
| 1q21.1 dup                    | 18.8% (3/16)                                                     | 12.5% (1/8)                                                           | 4.9% (4/81)                                            |
| 3q29 del                      | 0% (0/10)                                                        | 0% (0/0)                                                              | 20.0% (4/20)                                           |
| WBS dup                       | 28% (2/7)                                                        | 0% (0/2)                                                              | 5.1% (2/39)                                            |
| 15q11.2 del                   | 11.9% (10/84)                                                    | 6.8% (5/73)                                                           | 16.3% (27/166)                                         |
| Angelman<br>/Prader-Willi dup | 16.7% (2/12)                                                     | 0% (0/0)                                                              | 6.1% (5/82)                                            |
| 15q13.3 del                   | 5.9% (1/17)                                                      | 0% (0/4)                                                              | 8.2% (7/85)                                            |
| 16p13.11 dup                  | 6.7% (3/45)                                                      | 10% (4/40)                                                            | 8.2% (8/98)                                            |
| 16p11.2 distal del            | 0% (0/5)                                                         | 0% (0/4)                                                              | 12.9% (4/31)                                           |
| 16p11.2 dup                   | 7.3% (3/41)                                                      | 0% (0/4)                                                              | 14.5% (12/83)                                          |
| 17q12 del                     | 50% (1/2)                                                        | 0% (0/0)                                                              | 11.5% (3/26)                                           |
| 22q11.2 del                   | 4.2% (2/48)                                                      | 0% (0/0)                                                              | 4.6% (8/175)                                           |
| Overall %:                    | 10.0% (31/311)                                                   | 7.1%(10/141)                                                          | 9.3% (92/986)                                          |

See Table S2 for abbreviations.

## Supplemental References

1. Girirajan S, Rosenfeld JA, Coe BP, Parikh S, Friedman N, Goldstein A, *et al.* (2012): Phenotypic heterogeneity of genomic disorders and rare copy-number variants. *N Engl J Med* 367: 1321-1331.
2. Rosenfeld JA, Coe BP, Eichler EE, Cuckle H, Shaffer LG (2013): Estimates of penetrance for recurrent pathogenic copy-number variations. *Genet Med* 15: 478-81.
3. Chen X, Shen Y, Zhang F, Chiang C, Pillalamarri V, Blumenthal I, *et al.* (2013): Molecular analysis of a deletion hotspot in the NRXN1 region reveals the involvement of short inverted repeats in deletion CNVs. *Am J Hum Genet* 92: 375-386.
4. Malhotra D, Sebat J (2012): CNVs: Harbingers of a rare variant revolution in psychiatric genetics. *Cell* 148: 1223-1241.
5. Brunetti-Pierri N, Berg JS, Scaglia F, Belmont J, Bacino CA, Sahoo T, *et al.* (2008): Recurrent reciprocal 1q21.1 deletions and duplications associated with microcephaly or macrocephaly and developmental and behavioral abnormalities. *Nat Genet* 40: 1466-1471.
6. Mefford HC, Sharp AJ, Baker C, Itsara A, Jiang Z, Buysse K, *et al.* (2008): Recurrent rearrangements of chromosome 1q21.1 and variable pediatric phenotypes. *N Engl J Med* 359: 1685-1699.
7. Buysse K, Delle Chiaie B, Van Coster R, Loeys B, De Paepe A, Mortier G, *et al.* (2009): Challenges for CNV interpretation in clinical molecular karyotyping: Lessons learned from a 1001 sample experience. *Eur J Med Genet* 52: 398-403.
8. Jaillard S, Drunat S, Bendavid C, Aboura A, Etcheverry A, Journel H, *et al.* (2010): Identification of gene copy number variations in patients with mental retardation using array-CGH: Novel syndromes in a large French series. *Eur J Med Genet* 53: 66-75.
9. Christiansen J, Dyck JD, Elyas BG, Lilley M, Bamforth JS, Hicks M, *et al.* (2004): Chromosome 1q21.1 contiguous gene deletion is associated with congenital heart disease. *Circ Res* 94: 1429-1435.
10. Malhotra D, McCarthy S, Michaelson Jacob J, Vacic V, Burdick Katherine E, Yoon S, *et al.* (2011): High frequencies of de novo CNVs in bipolar disorder and schizophrenia. *Neuron* 72: 951-963.
11. Griswold AJ, Ma D, Cukier HN, Nations LD, Schmidt MA, Chung R-H, *et al.* (2012): Evaluation of copy number variations reveals novel candidate genes in autism spectrum disorder-associated pathways. *Hum Mol Genet* 21: 3513-3523.
12. Girirajan S, Dennis Megan Y, Baker C, Malig M, Coe Bradley P, Campbell Catarina D, *et al.* (2013): Refinement and discovery of new hotspots of copy-number variation associated with autism spectrum disorder. *Am J Hum Genet* 92: 221-237.
13. Guilmatre A, Dubourg C, Mosca A-L, Legallic S, Goldenberg A, Drouin-Garraud V, *et al.* (2009): Recurrent rearrangements in synaptic and neurodevelopmental genes and shared biologic pathways in schizophrenia, autism, and mental retardation. *Arch Gen Psychiatry* 66: 947-956.
14. Glessner JT, Wang K, Cai G, Korvatska O, Kim CE, Wood S, *et al.* (2009): Autism genome-wide copy number variation reveals ubiquitin and neuronal genes. *Nature* 459: 569-573.
15. Kirov G, Pocklington AJ, Holmans P, Ivanov D, Ikeda M, Ruderfer D, *et al.* (2012): De novo CNV analysis implicates specific abnormalities of postsynaptic signalling complexes in the pathogenesis of schizophrenia. *Mol Psychiatry* 17: 142-153.
16. Bradley WEC, Raelson JV, Dubois DY, Godin É, Fournier H, Privé C, *et al.* (2001): Hotspots of large rare deletions in the human genome. *PLoS One* 5: e9401.

17. The Autism Genome Project Consortium (2007): Mapping autism risk loci using genetic linkage and chromosomal rearrangements. *Nat Genet* 39: 319-328.
18. Ching MSL, Shen Y, Tan W-H, Jeste SS, Morrow EM, Chen X, *et al.* (2010): Deletions of NRXN1 (neurexin-1) predispose to a wide spectrum of developmental disorders. *Am J Med Genet B Neuropsychiatr Genet* 153B: 937-947.
19. Shen Y, Dies KA, Holm IA, Bridgemohan C, Sobeih MM, Caronna EB, *et al.* (2010): Clinical genetic testing for patients with autism spectrum disorders. *Pediatrics* 125: e727-e735.
20. Bremer A, Giacobini M, Eriksson M, Gustavsson P, Nordin V, Fernell E, *et al.* (2011): Copy number variation characteristics in subpopulations of patients with autism spectrum disorders. *Am J Med Genet B Neuropsychiatr Genet* 156: 115-124.
21. Levy D, Ronemus M, Yamrom B, Lee Y-h, Leotta A, Kendall J, *et al.* (2011): Rare de novo and transmitted copy-number variation in autistic spectrum disorders. *Neuron* 70: 886-897.
22. Sanders SJ, Ercan-Sencicek AG, Hus V, Luo R, Murtha MT, Moreno-De-Luca D, *et al.* (2011): Multiple recurrent de novo CNVs, including duplications of the 7q11.23 Williams Syndrome region, are strongly associated with autism. *Neuron* 70: 863-885.
23. Schaaf CP, Boone PM, Sampath S, Williams C, Bader PI, Mueller JM, *et al.* (2012): Phenotypic spectrum and genotype-phenotype correlations of NRXN1 exon deletions. *Eur J Hum Genet* 20: 1240-1247.
24. Ballif B, Theisen A, Coppinger J, Gowans G, Hersh J, Madan-Khetarpal S, *et al.* (2008): Expanding the clinical phenotype of the 3q29 microdeletion syndrome and characterization of the reciprocal microduplication. *Mol Cytogenet* 1: 8.
25. Willatt L, Cox J, Barber J, Cabanas ED, Collins A, Donnai D, *et al.* (2005): 3q29 microdeletion syndrome: Clinical and molecular characterization of a new syndrome. *Am J Hum Genet* 77: 154-160.
26. Mulle JG, Dodd AF, McGrath JA, Wolyniec PS, Mitchell AA, Shetty AC, *et al.* (2010): Microdeletions of 3q29 confer high risk for schizophrenia. *Am J Hum Genet* 87: 229-236.
27. Girirajan S, Brkanac Z, Coe BP, Baker C, Vives L, Vu TH, *et al.* (2011): Relative burden of large CNVs on a range of neurodevelopmental phenotypes. *PLoS Genet* 7: e1002334.
28. Van der Aa N, Rooms L, Vandeweyer G, van den Ende J, Reyniers E, Fichera M, *et al.* (2009): Fourteen new cases contribute to the characterization of the 7q11.23 microduplication syndrome. *Eur J Med Genet* 52: 94-100.
29. Dixit A, McKee S, Mansour S, Mehta SG, Tanteles GA, Anastasiadou V, *et al.* (2013): 7q11.23 Microduplication: a recognizable phenotype. *Clinical Genetics* 83: 155-161.
30. Dutly F, Schinzel A. (1996): Unequal interchromosomal rearrangements may result in elastin gene deletions causing the Williams-Beuren syndrome. *Hum Mol Genet* 5: 1893-1898.
31. Doornbos M, Sikkema-Raddatz B, Ruijvenkamp CAL, Dijkhuizen T, Bijlsma EK, Gijbbers ACJ, *et al.* (2009): Nine patients with a microdeletion 15q11.2 between breakpoints 1 and 2 of the Prader-Willi critical region, possibly associated with behavioural disturbances. *Eur J Med Genet* 52: 108-115.
32. de Kovel CGF, Trucks H, Helbig I, Mefford HC, Baker C, Leu C, *et al.* (2010): Recurrent microdeletions at 15q11.2 and 16p13.11 predispose to idiopathic generalized epilepsies. *Brain* 133: 23-32.
33. Burnside R, Pasion R, Mikhail F, Carroll A, Robin N, Youngs E, *et al.* (2011): Microdeletion/microduplication of proximal 15q11.2 between BP1 and BP2: a

- susceptibility region for neurological dysfunction including developmental and language delay. *Hum Genet* 130: 517-528.
34. Sharp AJ, Mefford HC, Li K, Baker C, Skinner C, Stevenson RE, *et al.* (2008): A recurrent 15q13.3 microdeletion syndrome associated with mental retardation and seizures. *Nat Genet* 40: 322-328.
  35. van Bon BWM, Mefford HC, Menten B, Koolen DA, Sharp AJ, Nillesen WM, *et al.* (2009): Further delineation of the 15q13 microdeletion and duplication syndromes: a clinical spectrum varying from non-pathogenic to a severe outcome. *J Med Genet* 46: 511-523.
  36. Dibbens LM, Mullen S, Helbig I, Mefford HC, Bayly MA, Bellows S, *et al.* (2009): Familial and sporadic 15q13.3 microdeletions in idiopathic generalized epilepsy: precedent for disorders with complex inheritance. *Hum Mol Genet* 18: 3626-3631.
  37. Ingason A, Kirov G, Giegling I, Hansen T, Isles AR, Jakobsen KD, *et al.* (2011): Maternally derived microduplications at 15q11-q13: Implication of imprinted genes in psychotic illness. *Am J Psychiatry* appi.ajp.2010.09111660.
  38. Marshall CR, Noor A, Vincent JB, Lionel AC, Feuk L, Skaug J, *et al.* (2008): Structural variation of chromosomes in autism spectrum disorder. *Am J Hum Genet* 82: 477-488.
  39. Butler MG, Meaney FJ, Palmer CG (1986): Clinical and cytogenetic survey of 39 individuals with Prader-Labhart-Willi syndrome. *Am J Med Genet* 23: 793-809.
  40. Chan CT, Clayton-Smith J, Cheng XJ, Buxton J, Webb T, Pembrey ME, *et al.* (1993): Molecular mechanisms in Angelman syndrome: a survey of 93 patients. *J Med Genet* 30: 895-902.
  41. Magoulas PL, El-Hattab AW (2012): Chromosome 15q24 microdeletion syndrome. *Orphanet J Rare Dis* 7: 1-9.
  42. Hennekam RC, Tilanus M, Hamel BC, Voshart-van Heeren H, Mariman EC, Van Beersum SE, *et al.* (1993): Deletion at chromosome 16p13.3 as a cause of Rubinstein-Taybi syndrome: clinical aspects. *Am J Hum Genet* 52: 255.
  43. Ullmann R, Turner G, Kirchhoff M, Chen W, Tonge B, Rosenberg C, *et al.* (2007): Array CGH identifies reciprocal 16p13.1 duplications and deletions that predispose to autism and/or mental retardation. *Hum Mutat* 28: 674-682.
  44. Hannes FD, Sharp AJ, Mefford HC, de Ravel T, Ruivenkamp CA, Breuning MH, *et al.* (2009): Recurrent reciprocal deletions and duplications of 16p13.11: the deletion is a risk factor for MR/MCA while the duplication may be a rare benign variant. *J Med Genet* 46: 223-232.
  45. Williams NM, Zaharieva I, Martin A, Langley K, Mantripragada K, Fossdal R, *et al.* (2010): Rare chromosomal deletions and duplications in attention-deficit hyperactivity disorder: a genome-wide analysis. *Lancet* 376: 1401-1408.
  46. Nagamani SCS, Erez A, Bader P, Lalani SR, Scott DA, Scaglia F, *et al.* (2011): Phenotypic manifestations of copy number variation in chromosome 16p13.11. *Eur J Hum Genet* 19: 280-286.
  47. Kuang S-Q, Guo D-C, Prakash SK, McDonald M-LN, Johnson RJ, Wang M, *et al.* (2011): Recurrent chromosome 16p13.1 duplications are a risk factor for aortic dissections. *PLoS Genet* 7: e1002118.
  48. Bochukova EG, Huang N, Keogh J, Henning E, Purmann C, Blaszczyk K, *et al.* (2010): Large, rare chromosomal deletions associated with severe early-onset obesity. *Nature* 463: 666-670.
  49. Bachmann-Gagescu R, Mefford HC, Cowan C, Glew GM, Hing AV, Wallace S, *et al.* (2010): Recurrent 200-kb deletions of 16p11.2 that include the SH2B1 gene are associated with developmental delay and obesity. *Genet Med* 12: 641-647.

50. Guha S, Rees E, Darvasi A, Ivanov D, Ikeda M, Bergen SE, *et al.* (2013): Implication of a rare deletion at distal 16p11.2 in schizophrenia. *JAMA Psychiatry* 1-8.
51. Barge-Schaapveld DQCM, Maas SM, Polstra A, Knegt LC, Hennekam RCM. (2011): The atypical 16p11.2 deletion: A not so atypical microdeletion syndrome? *Am J Med Genet A* 155: 1066-1072.
52. Bijlsma EK, Gijsbers ACJ, Schuurs-Hoeijmakers JHM, van Haeringen A, Franssen van de Putte DE, Anderlid BM, *et al.* (2009): Extending the phenotype of recurrent rearrangements of 16p11.2: Deletions in mentally retarded patients without autism and in normal individuals. *Eur J Med Genet* 52: 77-87.
53. Walsh T, McClellan JM, McCarthy SE, Addington AM, Pierce SB, Cooper GM, *et al.* (2008): Rare structural variants disrupt multiple genes in neurodevelopmental pathways in schizophrenia. *Science* 320: 539-543.
54. McCarthy SE, Makarov V, Kirov G, Addington AM, McClellan J, Yoon S, *et al.* (2009): Microduplications of 16p11.2 are associated with schizophrenia. *Nat Genet* 41: 1223-1227.
55. Fernandez BA, Roberts W, Chung B, Weksberg R, Meyn S, Szatmari P, *et al.* (2010): Phenotypic spectrum associated with de novo and inherited deletions and duplications at 16p11.2 in individuals ascertained for diagnosis of autism spectrum disorder. *J Med Genet* 47: 195-203.
56. Grozeva D, Kirov G, Ivanov D, Jones IR, Jones L, Green EK, *et al.* (2010): Rare copy number variants: a point of rarity in genetic risk for bipolar disorder and schizophrenia. *Arch Gen Psychiatry* 67: 318-327.
57. Shinawi M, Liu P, Kang S-HL, Shen J, Belmont JW, Scott DA, *et al.* (2010): Recurrent reciprocal 16p11.2 rearrangements associated with global developmental delay, behavioural problems, dysmorphism, epilepsy, and abnormal head size. *J Med Genet* 47: 332-341.
58. Smith A, Robson L. (1999): Low frequency of inherited deletions of 22q11. *Am J Med Genet* 85: 513-514.
59. Moreno-De-Luca D, Mulle JG, Kaminsky EB, Sanders SJ, Myers SM, Adam MP, *et al.* (2010): Deletion 17q12 is a recurrent copy number variant that confers high risk of autism and schizophrenia. *Am J Hum Genet* 87: 618-630.
60. Xu B, Roos JL, Levy S, van Rensburg EJ, Gogos JA, Karayiorgou M (2008): Strong association of de novo copy number mutations with sporadic schizophrenia. *Nat Genet* 40: 880-885.
61. Swillen A, Devriendt K, Vantrappen G, Vogels A, Rommel N, Fryns J-P, *et al.* (1998): Familial deletions of chromosome 22q11: The Leuven experience. *Am J Med Genet* 80: 531-532.
62. Digilio MC, Marino B, Giannotti A, Dallapiccola B. (1997): Familial deletions of chromosome 22q11. *Am J Med Genet* 73: 95-96.
63. Ryan AK, Goodship JA, Wilson DI, Philip N, Levy A, Seidel H, *et al.* (1997): Spectrum of clinical features associated with interstitial chromosome 22q11 deletions: a European collaborative study. *J Med Genet* 34: 798-804.
64. Thompson PW, Davies SJ (1998): Frequency of inherited deletions of 22q11. *J Med Genet* 35: 789.
65. Driscoll DA, Salvin J, Sellinger B, Budarf ML, McDonald-McGinn DM, Zackai EH, *et al.* (1993): Prevalence of 22q11 microdeletions in DiGeorge and velocardiofacial syndromes: implications for genetic counselling and prenatal diagnosis. *J Med Genet* 30: 813-817.
66. Worthington S, Bower C, Harrop K, Loh J, Walpole I. (1998): 22q11 deletions in patients with conotruncal heart defects. *J Paediatr Child Health* 34: 438-443.

67. Vassos E, Collier DA, Holden S, Patch C, Rujescu D, St Clair D, *et al.* (2010): Penetrance for copy number variants associated with schizophrenia. *Hum Mol Genet* 19: 3477-3481.
68. Levinson DF, Duan J, Oh S, Wang K, Sanders AR, Shi J, *et al.* (2011): Copy number variants in schizophrenia: Confirmation of five previous findings and new evidence for 3q29 microdeletions and VIPR2 duplications. *Am J Psychiatry* 168:302-316.
69. Mulle JG, Pulver AE, McGrath JM, Wolyniec P, Dodd AF, Cutler DJ, *et al.* (2013): Reciprocal duplication of the Williams-Beuren syndrome deletion on chromosome 7q11.23 is associated with schizophrenia. *Biol Psychiatry* (in press).
